# Supplementary material for: Responses of the Housefly, Musca domestica, to the Hytrosavirus Replication: Impacts on Host's Vitellogenesis and Immunity
Source: Front Microbiol. 2017 Apr 5;8:583. doi: 10.3389/fmicb.2017.00583 (PMC5380684; doi:10.3389/fmicb.2017.00583)
Supplement: Table S5 — Pathways associated with upregulated proteins. KEGG pathway mapping of Musca domestica genes whose transcription was upregulated in the MdSGHV-infected flies compared to the PBS-injected controls. The numbers of the host genes that were upregulated are shown in reference to the total number of housefly genes that have been associated with each pathway. The KEGG pathways are hyperlinked. [file DataSheet2.xlsx]

## Sheet: Table S5 (Upregulated)
Table S5: Pathways associated with upregulated proteins. KEGG pathway mapping of Musca domestica genes whose transcription was upregulated in the MdSGHV-infected flies compared to the PBS-injected controls. The numbers of the host genes that were upregulated are shown in reference to the total number of housefly genes that have been associated with each pathway. The KEGG pathways are hyperlinked.
KEGG Pathway ID (Hyperlink)	Description of the KEGG Pathways	# Genes Mapped	# Background Genes (Md database)	NCBI Protein gi|Acc.version|names
mde01100	Metabolic pathways	34	928	>gi|755850412|ref|XP_011290830.1|UDP-glucuronosyltransferase 2A3-like; >gi|557771827|ref|XP_005185572.1|adenosine deaminase CECR1-like; >gi|558515909|ref|NP_001273800.1|uncharacterized protein LOC101900547 precursor; >gi|557752623|ref|XP_005176059.1|sarcosine dehydrogenase, mitochondrial; >gi|755875929|ref|XP_011292629.1|prolyl 4-hydroxylase subunit alpha-1; >gi|557769265|ref|XP_005184307.1|gluta…
mde00983	Drug metabolism - other enzymes	9	52	>gi|755850412|ref|XP_011290830.1|UDP-glucuronosyltransferase 2A3-like; >gi|755854837|ref|XP_005176672.2|uridine phosphorylase 1; >gi|755854832|ref|XP_011296216.1|uridine phosphorylase 1 isoform X1; >gi|557760640|ref|XP_005180040.1|cytidine deaminase-like; >gi|557767750|ref|XP_005183562.1|xanthine dehydrogenase-like; >gi|557780336|ref|XP_005189790.1|UDP-glucuronosyltransferase 2A3-like isoform X2;…
mde00520	Amino sugar & nucleotide sugar metabolism	7	48	>gi|557777614|ref|XP_005188441.1|probable chitinase 2; >gi|557769265|ref|XP_005184307.1|glutamine - fructose-6-phosphate aminotransferase; >gi|755865768|ref|XP_011291179.1|uncharacterized protein LOC101898706; >gi|558515909|ref|NP_001273800.1|uncharacterized protein LOC101900547 precursor; >gi|557784311|ref|XP_005191759.1|probable chitinase 3; >gi|755867255|ref|XP_011291381.1|probable chitinase 3…
mde00230	Purine metabolism	7	130	>gi|557771827|ref|XP_005185572.1|adenosine deaminase CECR1-like; >gi|755851236|ref|XP_005175484.2|protein 5'NUC-like; >gi|557773173|ref|XP_005186240.1|Ca(2+)/calmodulin-responsive adenylate cyclase-like; >gi|755850321|ref|XP_005175175.2|atrial natriuretic peptide receptor 1-like; >gi|557767750|ref|XP_005183562.1|xanthine dehydrogenase-like; >gi|755883640|ref|XP_011293776.1|amidophosphoribosyltran…
mde00040	Pentose & glucuronate interconversions	5	49	>gi|755850412|ref|XP_011290830.1|UDP-glucuronosyltransferase; >gi|557783777|ref|XP_005191495.1|sorbitol dehydrogenase; >gi|557780782|ref|XP_005190012.1|UDP-glucuronosyltransferase-like; >gi|557750903|ref|XP_005175212.1|UDP-glucuronosyltransferase 2B9-like; >gi|557780336|ref|XP_005189790.1|UDP-glucuronosyltransferase 2A3-like isoform X2
mde00500	Starch & sucrose metabolism	5	58	>gi|557783280|ref|XP_005191248.1|glucose-6-phosphatase; >gi|557780782|ref|XP_005190012.1|UDP-glucuronosyltransferase-like; >gi|755850412|ref|XP_011290830.1|UDP-glucuronosyltransferase 2A3-like; >gi|557750903|ref|XP_005175212.1|UDP-glucuronosyltransferase 2B9-like; >gi|557780336|ref|XP_005189790.1|UDP-glucuronosyltransferase 2A3-like isoform X2
mde00980	Metabolism of xenobiotics by cytochrome P450	5	64	>gi|755850412|ref|XP_011290830.1|UDP-glucuronosyltransferase 2A3-like; >gi|557780782|ref|XP_005190012.1|UDP-glucuronosyltransferase-like; >gi|557760759|ref|XP_005180099.1|glutathione S-transferase 4-like ; >gi|557750903|ref|XP_005175212.1|UDP-glucuronosyltransferase 2B9-like; >gi|557780336|ref|XP_005189790.1|UDP-glucuronosyltransferase 2A3-like isoform X2
mde00982	Drug metabolism - cytochrome P450	5	64	>gi|755850412|ref|XP_011290830.1|UDP-glucuronosyltransferase 2A3-like; >gi|557780782|ref|XP_005190012.1|UDP-glucuronosyltransferase-like; >gi|557760759|ref|XP_005180099.1|glutathione S-transferase 4-like; >gi|557750903|ref|XP_005175212.1|UDP-glucuronosyltransferase 2B9-like; >gi|557780336|ref|XP_005189790.1|UDP-glucuronosyltransferase 2A3-like isoform X2
mde00240	Pyrimidine metabolism	5	86	>gi|755854832|ref|XP_011296216.1|uridine phosphorylase 1 isoform X1; >gi|557779070|ref|XP_005189162.1|dihydropyrimidine dehydrogenase [NADP(+)]; >gi|755854837|ref|XP_005176672.2|uridine phosphorylase 1; >gi|557760640|ref|XP_005180040.1|cytidine deaminase-like; >gi|755851236|ref|XP_005175484.2|protein 5'NUC-like
mde04142	Lysosome	5	108	>gi|755869401|ref|XP_011291684.1|CD63 antigen; >gi|755904621|ref|XP_011295928.1|alpha-N-acetylgalactosaminidase; >gi|557762278|ref|XP_005180853.1|lipase 3; >gi|557769946|ref|XP_005184644.1|beta-mannosidase-like; >gi|557780736|ref|XP_005189989.1|lysosomal alpha-mannosidase isoform X2
mde00830	Retinol metabolism	4	35	>gi|755850412|ref|XP_011290830.1|UDP-glucuronosyltransferase 2A3-like; >gi|557780782|ref|XP_005190012.1|UDP-glucuronosyltransferase-like; >gi|557750903|ref|XP_005175212.1|UDP-glucuronosyltransferase 2B9-like; >gi|557780336|ref|XP_005189790.1|UDP-glucuronosyltransferase 2A3-like isoform X2
mde00053	Ascorbate & aldarate metabolism	4	37	>gi|755850412|ref|XP_011290830.1|UDP-glucuronosyltransferase 2A3-like; >gi|557780782|ref|XP_005190012.1|UDP-glucuronosyltransferase-like; >gi|557750903|ref|XP_005175212.1|UDP-glucuronosyltransferase 2B9-like; >gi|557780336|ref|XP_005189790.1|UDP-glucuronosyltransferase 2A3-like isoform X2
mde00860	Porphyrin & chlorophyll metabolism	4	47	>gi|755850412|ref|XP_011290830.1|UDP-glucuronosyltransferase 2A3-like 2A3-like; >gi|557780782|ref|XP_005190012.1|UDP-glucuronosyltransferase-like; >gi|557750903|ref|XP_005175212.1|UDP-glucuronosyltransferase 2B9-like; >gi|557780336|ref|XP_005189790.1|UDP-glucuronosyltransferase 2A3-like isoform X2
mde04745	Phototransduction - fly	3	24	>gi|557763398|ref|XP_005181411.1|actin, indirect flight muscle; >gi|755900844|ref|XP_011295823.1|transient receptor potential-gamma protein; >gi|557763398|ref|XP_005181411.1|actin, indirect flight muscle
mde00260	Glycine, serine & threonine metabolism	3	34	>gi|557777402|ref|XP_005188335.1|glycine N-methyltransferase; >gi|557752623|ref|XP_005176059.1|sarcosine dehydrogenase, mitochondrial; >gi|557779949|ref|XP_005189598.1|serine hydroxymethyltransferase, cytosolic isoform X1
mde00330	Arginine & proline metabolism	3	39	>gi|557760612|ref|XP_005180026.1|arginase-1; >gi|755875929|ref|XP_011292629.1|prolyl 4-hydroxylase subunit alpha-1; >gi|755875984|ref|XP_011292636.1|prolyl 4-hydroxylase subunit alpha-2-like
mde04931	Insulin resistance	3	42	>gi|557783280|ref|XP_005191248.1|glucose-6-phosphatase 2; >gi|557769265|ref|XP_005184307.1|glutamine - fructose-6-phosphate aminotransferase; >gi|557750735|ref|XP_005175129.1|target of rapamycin
mde04391	Salvador/Warts/Hippo (SWH) pathway - fly	3	67	>gi|557782049|ref|XP_005190640.1|protein dachsous-like; >gi|557763398|ref|XP_005181411.1|actin, indirect flight muscle; >gi|557763398|ref|XP_005181411.1|actin, indirect flight muscle
mde03013	RNA transport	3	120	>gi|557755936|ref|XP_005177706.1|regulator of nonsense transcripts 3B; >gi|755889851|ref|XP_011294686.1|nuclear pore complex protein Nup205; >gi|557771347|ref|XP_005185335.1|elongation factor 1-alpha 2
mde00130	Ubiquinone & other terpenoid-quinone biosynthesis	2	11	>gi|755887005|ref|XP_011294272.1|hexaprenyldihydroxybenzoate methyltransferase, mitochondrial-like isoform X3; >gi|755890590|ref|XP_011294794.1|vitamin K-dependent gamma-carboxylase
mde00670	One carbon pool by folate	2	12	>gi|557757886|ref|XP_005178673.1|bifunctional methylenetetrahydrofolate dehydrogenase/cyclohydrolase, mitochondrial isoform X2; >gi|557779949|ref|XP_005189598.1|serine hydroxymethyltransferase, cytosolic isoform X1
mde00760	Nicotinate & nicotinamide metabolism	2	14	>gi|557765459|ref|XP_005182430.1|NAD kinase 2, mitochondrial isoform X2; >gi|755851236|ref|XP_005175484.2|protein 5'NUC-like
mde04512	Extracellular matrix (ECM)-receptor interaction	2	15	>gi|557773538|ref|XP_005186422.1|collagen alpha-1(IV) chain; >gi|557768085|ref|XP_005183728.1|collagen alpha-1(III) chain
mde00511	Other glycan degradation	2	18	>gi|557780736|ref|XP_005189989.1|lysosomal alpha-mannosidase isoform X2; >gi|557769946|ref|XP_005184644.1|beta-mannosidase-like
mde00981	Insect hormone biosynthesis	2	23	>gi|557759638|ref|XP_005179543.1|uncharacterized protein LOC101890701; >gi|557759674|ref|XP_005179561.1|uncharacterized protein LOC101893577
mde00250	Alanine, aspartate & glutamate metabolism	2	33	>gi|755883640|ref|XP_011293776.1|amidophosphoribosyltransferase; >gi|557769265|ref|XP_005184307.1|glutamine - fructose-6-phosphate aminotransferase
mde01230	Biosynthesis of amino acids	2	61	>gi|557760612|ref|XP_005180026.1|arginase-1; >gi|557779949|ref|XP_005189598.1|serine hydroxymethyltransferase, cytosolic isoform X1
mde04145	Phagosome	2	64	>gi|557763398|ref|XP_005181411.1|actin, indirect flight muscle; >gi|557763398|ref|XP_005181411.1|actin, indirect flight muscle,
mde04120	Ubiquitin mediated proteolysis	2	88	>gi|557782960|ref|XP_005191090.1|DET1 homolog; >gi|755901473|ref|XP_005191626.2|ubiquitin-protein ligase E3A-like
mde01200	Carbon metabolism	2	97	>gi|557779949|ref|XP_005189598.1|serine hydroxymethyltransferase, cytosolic isoform X1; >gi|557753434|ref|XP_005176462.1|NADP-dependent malic enzyme
mde04146	Peroxisome	2	99	>gi|755849787|ref|XP_005174999.2|long-chain-fatty-acid - CoA ligase 4-like; >gi|557767750|ref|XP_005183562.1|xanthine dehydrogenase-like
mde04141	Protein processing in endoplasmic reticulum	2	119	>gi|557776474|ref|XP_005187877.1|translocation protein SEC62 isoform X3; >gi|755899725|ref|XP_005191014.2|heat shock protein 70
mde04144	Endocytosis	2	125	>gi|755899725|ref|XP_005191014.2|heat shock protein 70; >gi|557766434|ref|XP_005182912.1|low density lipoprotein receptor adapter protein 1-A-like
mde03010	Ribosome	2	129	>gi|755852471|ref|XP_011294013.1|40S ribosomal protein S11 isoform X2; >gi|557780070|ref|XP_005189658.1|39S ribosomal protein L16, mitochondrial
mde00232	Caffeine metabolism	1	5	>gi|557767750|ref|XP_005183562.1|xanthine dehydrogenase-like
mde00460	Cyanoamino acid metabolism	1	6	>gi|557779949|ref|XP_005189598.1|serine hydroxymethyltransferase, cytosolic isoform X1
mde00603	Glycosphingolipid biosynthesis - globo series	1	7	>gi|755904621|ref|XP_011295928.1|alpha-N-acetylgalactosaminidase
mde00430	Taurine & hypotaurine metabolism	1	10	>gi|557775252|ref|XP_005187272.1|acidic amino acid decarboxylase GADL1-like
mde00061	Fatty acid biosynthesis	1	11	>gi|755849787|ref|XP_005174999.2|long-chain-fatty-acid - CoA ligase 4-like
mde00100	Steroid biosynthesis	1	12	>gi|557762278|ref|XP_005180853.1|lipase 3
mde00514	Other types of O-glycan biosynthesis	1	13	>gi|557759054|ref|XP_005179253.1|protein O-mannosyltransferase 1
mde00770	Pantothenate & CoA biosynthesis	1	14	>gi|557779070|ref|XP_005189162.1|dihydropyrimidine dehydrogenase [NADP(+)]
mde00512	Mucin type O-Glycan biosynthesis	1	19	>gi|755890323|ref|XP_005188993.2|polypeptide N-acetylgalactosaminyltransferase 2
mde00220	Arginine biosynthesis	1	19	>gi|557760612|ref|XP_005180026.1|arginase-1
mde03060	Protein export	1	21	>gi|557776474|ref|XP_005187877.1|translocation protein SEC62 isoform X3
mde02010	ATP-binding cassette (ABC) transporters	1	21	>gi|755885638|ref|XP_011294089.1|probable multidrug resistance-associated protein lethal(2)03659
mde00410	beta-Alanine metabolism	1	21	>gi|557779070|ref|XP_005189162.1|dihydropyrimidine dehydrogenase [NADP(+)]
mde00051	Fructose & mannose metabolism	1	22	>gi|557783777|ref|XP_005191495.1|sorbitol dehydrogenase
mde04330	Notch signaling pathway	1	22	>gi|755889993|ref|XP_011294701.1|protein serrate-like
mde00052	Galactose metabolism	1	24	>gi|557783280|ref|XP_005191248.1|glucose-6-phosphatase 2
mde00563	Glycosylphosphatidylinositol (GPI)-anchor biosynthesis	1	24	>gi|557757771|ref|XP_005178617.1|GPI mannosyltransferase 3 isoform X2
mde04630	Janus kinase/signal transducers & activators of transcription (JAK/STAT) pathway	1	27	>gi|557750735|ref|XP_005175129.1|target of rapamycin
mde04150	mammalian target of rapamycin (mTOR) signaling pathway	1	29	>gi|557750735|ref|XP_005175129.1|target of rapamycin
mde00630	Glyoxylate & dicarboxylate metabolism	1	29	>gi|557779949|ref|XP_005189598.1|serine hydroxymethyltransferase, cytosolic isoform X1
mde00310	Lysine degradation	1	39	>gi|557780784|ref|XP_005190013.1|histone-lysine N-methyltransferase SETD1
mde00620	Pyruvate metabolism	1	39	>gi|557753434|ref|XP_005176462.1|NADP-dependent malic enzyme
mde00010	Glycolysis / Gluconeogenesis	1	41	>gi|557783280|ref|XP_005191248.1|glucose-6-phosphatase 2
mde00071	Fatty acid degradation	1	43	>gi|755849787|ref|XP_005174999.2|long-chain-fatty-acid - CoA ligase 4-like
mde00562	Inositol phosphate metabolism	1	43	>gi|557761911|ref|XP_005180670.1|inositol monophosphatase 1
mde00970	Aminoacyl-tRNA biosynthesis	1	48	>gi|755851764|ref|XP_005175670.2|tryptophan - tRNA ligase, cytoplasmic-like
mde04070	Phosphatidylinositol signaling system	1	50	>gi|557761911|ref|XP_005180670.1|inositol monophosphatase 1
mde01212	Fatty acid metabolism	1	52	>gi|755849787|ref|XP_005174999.2|long-chain-fatty-acid - CoA ligase 4-like
mde04068	Forkhead box protein O (FoxO) signaling pathway	1	61	>gi|557783280|ref|XP_005191248.1|glucose-6-phosphatase 2
mde00564	Glycerophospholipid metabolism	1	62	>gi|755892420|ref|XP_011295063.1|acyl-protein thioesterase 1-like isoform X2
mde03015	mRNA surveillance pathway	1	64	>gi|557755936|ref|XP_005177706.1|regulator of nonsense transcripts 3B
mde00480	Glutathione metabolism	1	68	>gi|557760759|ref|XP_005180099.1|glutathione S-transferase 4-like
mde04080	Neuroactive ligand-receptor interaction	1	81	>gi|755855055|ref|XP_011296249.1|gamma-aminobutyric acid receptor alpha-like
mde03040	Spliceosome	1	116	>gi|755899725|ref|XP_005191014.2|heat shock protein 70
mde04711	Circadian rhythm - fly	1	8	>gi|557755601|ref|XP_005177539.1|period circadian protein isoform X1
mde00190	Oxidative phosphorylation	1	128	>gi|557753635|ref|XP_005176562.1|ATP synthase subunit alpha, mitochondrial

## Sheet: Table S6 (Downregulated
Table S6: Pathways associated with downregulated proteins. KEGG pathway mapping of Musca domestica genes whose transcription was downregulated in the MdSGHV-infected flies compared to the PBS-injected controls. The numbers of the host genes that were downregulated are shown in reference to the total number of housefly genes that have been associated with each pathway. The KEGG pathways are hyperl…
KEGG Pathway ID (Hyperlink)	Description of the KEGG Pathways	# Genes Mapped	# Background Genes (Md database)	NCBI Protein gi|Acc.version|names
mde01100	Metabolic pathways	23	928	>gi|557765915|ref|XP_005182655.1|DNA primase small subunit; >gi|557761614|ref|XP_005180525.1|uncharacterized protein LOC101894150 isoform X1 primase small subunit; >gi|557781602|ref|XP_005190419.1|alanine - glyoxylate aminotransferase 2-like; >gi|755887308|ref|XP_011294327.1|DNA polymerase alpha subunit B-like; >gi|755888524|ref|XP_005188374.2|sialic acid synthase;>gi|557771252|ref|XP_005185288.1…
mde03030	DNA replication	10	35	>gi|557765915|ref|XP_005182655.1|DNA primase small subunit; >gi|557769319|ref|XP_005184333.1|DNA replication licensing factor MCM4; >gi|557771120|ref|XP_005185222.1|DNA polymerase alpha catalytic subunit; >gi|557764745|ref|XP_005182079.1|DNA replication licensing factor Mcm3; >gi|557765687|ref|XP_005182541.1|DNA polymerase epsilon catalytic subunit A; >gi|755887308|ref|XP_011294327.1|DNA polymera…
mde00240	Pyrimidine metabolism	10	86	>gi|557765915|ref|XP_005182655.1|DNA primase small subunit; >gi|557755858|ref|XP_005177667.1|probable deoxycytidylate deaminase; >gi|557771120|ref|XP_005185222.1|DNA polymerase alpha catalytic subunit; >gi|557778147|ref|XP_005188706.1|deoxyuridine 5'-triphosphate nucleotidohydrolase; >gi|557761614|ref|XP_005180525.1|uncharacterized protein LOC101894150 isoform X1 primase small subunit; >gi|557765…
mde00230	Purine metabolism	10	130	>gi|755852100|ref|XP_005175769.2|adenosine kinase-like; >gi|557765915|ref|XP_005182655.1|DNA primase small subunit; >gi|755875294|ref|XP_011292547.1|cAMP-specific; >gi|557761614|ref|XP_005180525.1|uncharacterized protein LOC101894150 isoform X1 primase small subunit; >gi|557771120|ref|XP_005185222.1|DNA polymerase alpha catalytic subunit; >gi|557765687|ref|XP_005182541.1|DNA polymerase epsilon ca…
mde04068	Forkhead box protein O (FoxO) signaling pathway	6	61	>gi|557753657|ref|XP_005176573.1|G2/mitotic-specific cyclin-; >gi|557754007|ref|XP_005176748.1|serine/threonine-protein kinase polo; >gi|755867013|ref|XP_011291344.1|G2/mitotic-specific cyclin-B3; >gi|557774050|ref|XP_005186675.1|serine/threonine-protein kinase NLK; >gi|557762600|ref|XP_005181014.1|serine/threonine-protein kinase ATM; >gi|557756002|ref|XP_005177739.1|cell division control protein…
mde04120	Ubiquitin mediated proteolysis	6	88	>gi|557764581|ref|XP_005181997.1|protein Vhl isoform X1; >gi|557771710|ref|XP_005185514.1|E2/E3 hybrid ubiquitin-protein ligase UBE2O; >gi|557755886|ref|XP_005177681.1|E3 ubiquitin-protein ligase CBL; >gi|557781926|ref|XP_005190579.1|F-box/WD repeat-containing protein 11; >gi|755870064|ref|XP_011291776.1|cell division cycle protein 20 homolog; >gi|557781753|ref|XP_005190494.1|E3 SUMO-protein liga…
mde03410	Base excision repair	4	19	>gi|755873929|ref|XP_011292354.1|endonuclease III-like protein 1; >gi|557765687|ref|XP_005182541.1|DNA polymerase epsilon catalytic subunit A; >gi|557763788|ref|XP_005181604.1|recombination repair protein 1 isoform X2; >gi|557758204|ref|XP_005178831.1|DNA polymerase epsilon subunit 4
mde03420	Nucleotide excision repair	4	38	>gi|755857710|ref|XP_005177617.2|DNA excision repair protein ERCC-1; >gi|557765687|ref|XP_005182541.1|DNA polymerase epsilon catalytic subunit A; >gi|557761125|ref|XP_005180282.1|DNA repair protein complementing XP-A cells homolog; >gi|557758204|ref|XP_005178831.1|DNA polymerase epsilon subunit 4
mde04391	Salvador/Warts/Hippo (SWH) pathway - fly	4	67	>gi|557763231|ref|XP_005181328.1|probable protein S-acyltransferase 4 isoform X1; >gi|557776359|ref|XP_005187820.1|serine/threonine-protein kinase Warts; >gi|755865887|ref|XP_011291193.1|cadherin-related tumor suppressor; >gi|755859601|ref|XP_011290362.1|G1/S-specific cyclin-E isoform X1
mde04310	Wnt signaling pathway	4	78	>gi|557781926|ref|XP_005190579.1|F-box/WD repeat-containing protein 11; >gi|557774050|ref|XP_005186675.1|serine/threonine-protein kinase NLK; >gi|755894488|ref|XP_005190498.2|vang-like protein 2-B; >gi|557755244|ref|XP_005177363.1|1-phosphatidylinositol 4,5-bisphosphate phosphodiesterase isoform X2
mde04142	Lysosome	4	108	>gi|557752667|ref|XP_005176081.1|lipase 3-like; >gi|557779785|ref|XP_005189517.1|lysosomal aspartic protease-like; >gi|557776924|ref|XP_005188098.1|probable beta-hexosaminidase fdl beta-hexosaminidase fdl; >gi|557781286|ref|XP_005190262.1|N(4)-(Beta-N-acetylglucosaminyl)-L-asparaginase
mde03013	RNA transport	4	120	>gi|557780922|ref|XP_005190082.1|eukaryotic translation initiation factor 4E isoform X1; >gi|557763122|ref|XP_005181274.1|nuclear pore complex protein Nup153 isoform X2; >gi|755875261|ref|XP_011292542.1|importin subunit beta; >gi|557776568|ref|XP_005187923.1|nucleoporin Ndc1
mde03460	Fanconi anemia pathway	3	27	>gi|755857710|ref|XP_005177617.2|DNA excision repair protein ERCC-1; >gi|557752484|ref|XP_005175991.1|uncharacterized protein LOC101888284; >gi|557757864|ref|XP_005178662.1|ubiquitin-conjugating enzyme E2 T-like
mde00500	Starch & sucrose metabolism	3	58	>gi|557771573|ref|XP_005185447.1|alpha-amylase A;>gi|557771252|ref|XP_005185288.1|alpha-amylase A; >gi|755880418|ref|XP_005185446.2|alpha-amylase A-like
mde04146	Peroxisome	3	99	>gi|557753553|ref|XP_005176521.1|superoxide dismutase [Cu-Zn], chloroplastic isoform X1; >gi|755882906|ref|XP_011293679.1|fatty acyl-CoA reductase CG8306; >gi|755877445|ref|XP_011292849.1|ATP-binding cassette sub-family D member 2
mde00100	Steroid biosynthesis	2	12	>gi|557752667|ref|XP_005176081.1|lipase 3-like; >gi|557769596|ref|XP_005184471.1|sterol O-acyltransferase 1
mde00511	Other glycan degradation	2	18	>gi|557776924|ref|XP_005188098.1|probable beta-hexosaminidase fdl; >gi|557781286|ref|XP_005190262.1|N(4)-(Beta-N-acetylglucosaminyl)-L-asparaginase
mde02010	ATP-binding cassette (ABC) transporters	2	21	>gi|755877445|ref|XP_011292849.1|ATP-binding cassette sub-family D member 2; >gi|755885635|ref|XP_011294088.1|probable multidrug resistance-associated protein lethal(2)03659
mde00981	Insect hormone biosynthesis	2	23	>gi|755851848|ref|XP_011293048.1|cytochrome P450 307a1; >gi|557767487|ref|XP_005183432.1|cytochrome P450 18a1
mde00520	Amino sugar & nucleotide sugar metabolism	2	48	>gi|557776924|ref|XP_005188098.1|probable beta-hexosaminidase fdl beta-hexosaminidase fdl; >gi|755888524|ref|XP_005188374.2|sialic acid synthase
mde01200	Carbon metabolism	2	97	>gi|755878522|ref|XP_011293024.1|isocitrate dehydrogenase [NAD] subunit gamma, mitochondrial-like; >gi|557762902|ref|XP_005181164.1|3-hydroxyisobutyryl-CoA hydrolase, mitochondrial isoform X1
mde04144	Endocytosis	2	125	>gi|557783936|ref|XP_005191574.1|tyrosine-protein kinase Src64B; >gi|557755886|ref|XP_005177681.1|E3 ubiquitin-protein ligase CBL
mde00604	Glycosphingolipid biosynthesis - ganglio series	1	7	>gi|557776924|ref|XP_005188098.1|probable beta-hexosaminidase fdl beta-hexosaminidase fdl
mde00603	Glycosphingolipid biosynthesis - globo series	1	7	>gi|557776924|ref|XP_005188098.1|probable beta-hexosaminidase fdl beta-hexosaminidase fdl
mde00920	Sulfur metabolism	1	9	>gi|557773029|ref|XP_005186168.1|probable sulfite oxidase, mitochondrial
mde00531	Glycosaminoglycan degradation	1	12	>gi|557776924|ref|XP_005188098.1|probable beta-hexosaminidase fdl beta-hexosaminidase fdl
mde04512	Extracellular matrix (ECM)-receptor interaction	1	15	>gi|755888433|ref|XP_011294485.1|laminin subunit alpha-2
mde01210	2-Oxocarboxylic acid metabolism	1	17	>gi|755878522|ref|XP_011293024.1|isocitrate dehydrogenase [NAD] subunit gamma, mitochondrial-like
mde00062	Fatty acid elongation	1	17	>gi|755889461|ref|XP_005188714.2|elongation of very long chain fatty acids protein AAEL008004-like
mde03430	Mismatch repair	1	19	>gi|557765861|ref|XP_005182628.1|exonuclease 1
mde00030	Pentose phosphate pathway	1	20	>gi|755851053|ref|XP_011291688.1|glucose dehydrogenase [FAD, quinone]
mde00410	beta-Alanine metabolism	1	21	>gi|557762902|ref|XP_005181164.1|3-hydroxyisobutyryl-CoA hydrolase, mitochondrial isoform X1
mde00640	Propanoate metabolism	1	22	>gi|557762902|ref|XP_005181164.1|3-hydroxyisobutyryl-CoA hydrolase, mitochondrial isoform X1
mde04745	Phototransduction - fly	1	24	>gi|557755244|ref|XP_005177363.1|1-phosphatidylinositol 4,5-bisphosphate phosphodiesterase isoform X2
mde04630	Janus kinase/signal transducers & activators of transcription (JAK/STAT) pathway	1	27	>gi|557781753|ref|XP_005190494.1|E3 SUMO-protein ligase PIAS2 isoform X1
mde03020	RNA polymerase	1	28	>gi|557761614|ref|XP_005180525.1|uncharacterized protein LOC101894150 isoform X1
mde04150	mammalian target of rapamycin (mTOR) signaling pathway	1	29	>gi|557780922|ref|XP_005190082.1|eukaryotic translation initiation factor 4E isoform X1
mde04340	Hedgehog signaling pathway	1	30	>gi|557781926|ref|XP_005190579.1|F-box/WD repeat-containing protein 11
mde00280	Valine, leucine & isoleucine degradation	1	34	>gi|557762902|ref|XP_005181164.1|3-hydroxyisobutyryl-CoA hydrolase, mitochondrial isoform X1
mde03050	Proteasome	1	36	>gi|557756470|ref|XP_005177971.1|proteasome subunit alpha type-5
mde00020	tricarboxylic acid (TCA) cycle	1	36	>gi|755878522|ref|XP_011293024.1|isocitrate dehydrogenase [NAD] subunit gamma, mitochondrial-like
mde03022	Basal transcription factors	1	37	>gi|557771819|ref|XP_005185568.1|mucin-17
mde00510	N-Glycan biosynthesis	1	38	>gi|557759830|ref|XP_005179639.1|alpha-(1,6)-fucosyltransferase
mde00330	Arginine & proline metabolism	1	39	>gi|755887794|ref|XP_011294391.1|arginine kinase isoform X1
mde00310	Lysine degradation	1	39	>gi|557752781|ref|XP_005176138.1|histone-lysine N-methyltransferase Suv4-20
mde00562	Inositol phosphate metabolism	1	43	>gi|557755244|ref|XP_005177363.1|1-phosphatidylinositol 4,5-bisphosphate phosphodiesterase isoform X2
mde04070	Phosphatidylinositol signaling system	1	50	>gi|557755244|ref|XP_005177363.1|1-phosphatidylinositol 4,5-bisphosphate phosphodiesterase isoform X2
mde03018	RNA degradation	1	56	>gi|755904794|ref|XP_005191779.2|ATP-dependent RNA helicase me31b
mde01230	Biosynthesis of amino acids	1	61	>gi|755878522|ref|XP_011293024.1|isocitrate dehydrogenase [NAD] subunit gamma, mitochondrial-like
mde00564	Glycerophospholipid metabolism	1	62	>gi|557781602|ref|XP_005190419.1|alanine - glyoxylate aminotransferase 2-like
mde00982	Drug metabolism - cytochrome P450	1	64	>gi|755882008|ref|XP_005185996.2|microsomal glutathione S-transferase 1-like
mde00980	Metabolism of xenobiotics by cytochrome P450	1	64	>gi|755882008|ref|XP_005185996.2|microsomal glutathione S-transferase 1-like
mde04145	Phagosome	1	64	>gi|557773937|ref|XP_005186619.1|cytoplasmic dynein 1 intermediate chain isoform X13
mde00480	Glutathione metabolism	1	68	>gi|755882008|ref|XP_005185996.2|microsomal glutathione S-transferase 1-like
mde04080	Neuroactive ligand-receptor interaction	1	81	>gi|557750753|ref|XP_005175138.1|trypsin zeta-like
mde03040	Spliceosome	1	116	>gi|557767419|ref|XP_005183399.1|ATP-dependent RNA helicase dbp2
